# Supplementary material for: Chlorophyll catabolism precedes changes in chloroplast structure and proteome during leaf senescence
Source: PubMed Central journal article supplement (PMC6508775; doi:10.1002/pld3.127), 2019-03-20
Supplement: PLD3-3-e00127-s001.pdf [file PLD3-3-e00127-s001.pdf]

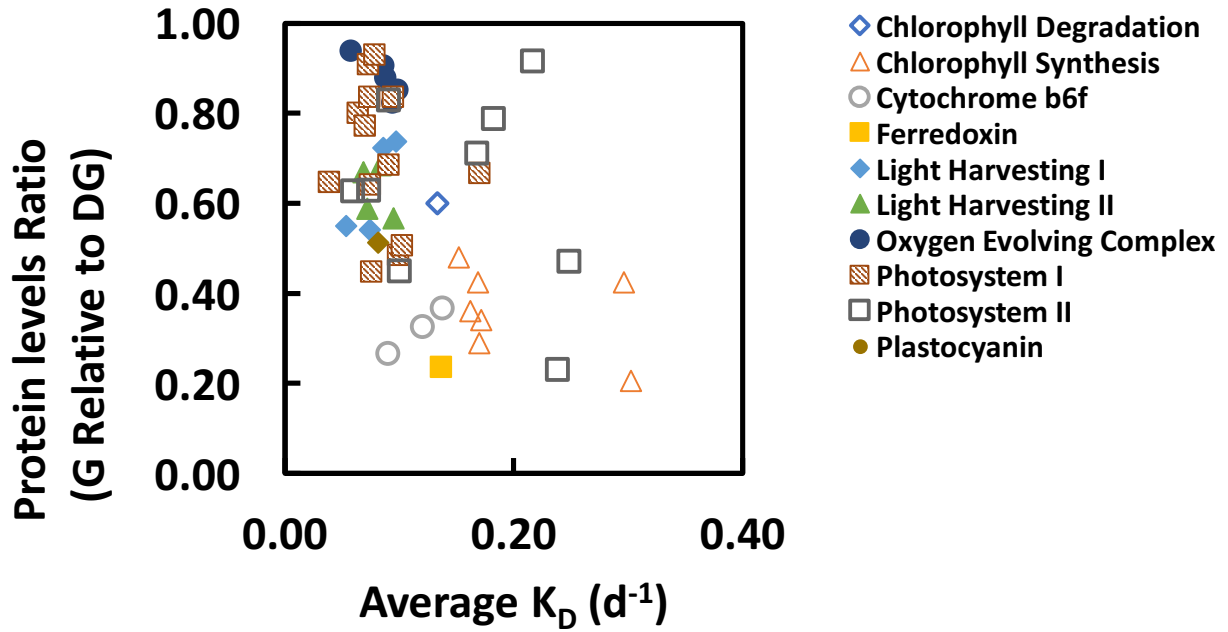

**Fig. S1 - Correlation between degradation rates of chloroplast proteins in mature and senescing leaves.**

Y axis - Levels of *Arabidopsis thaliana* chloroplast proteins (shown in Fig. 7) in Green (G) stage, compared to their levels in Dark Green (DG). X axis - Degradation rates of these proteins as determined by Li et al. 2017.
