# Supplementary material for: Chlorophyll catabolism precedes changes in chloroplast structure and proteome during leaf senescence
Source: PubMed Central journal article supplement (PMC6508775; doi:10.1002/pld3.127), 2019-03-20
Supplement: PLD3-3-e00127-s002.pdf [file PLD3-3-e00127-s002.pdf]

| <b>Protein Group</b> | <b>Gene name<br/>(TAIR)</b> | <b>Area DG<br/>Relative to DG</b> | <b>Area G<br/>Relative to DG</b> | <b>Area LG<br/>Relative to DG</b> | <b>Area Y Relative<br/>to DG</b> |
|----------------------|-----------------------------|-----------------------------------|----------------------------------|-----------------------------------|----------------------------------|
| ABC1K                | ABC1K1                      | 1.00                              | 0.74                             | 0.82                              | 0.33                             |
| ABC1K                | ABC1K3                      | 1.00                              | 1.17                             | 1.49                              | 0.56                             |
| ABC1K                | ABC1K5                      | 1.00                              | 0.67                             | 0.65                              | 0.27                             |
| ABC1K                | ABC1K6                      | 1.00                              | 0.71                             | 0.47                              | 0.18                             |
| ABC1K                | ABC1K7                      | 1.00                              | 1.82                             | 2.14                              | 1.13                             |
| ABC1K                | ABC1K9                      | 1.00                              | 1.17                             | 0.96                              | 0.41                             |
| ABC1K                | Average                     | 1.00                              | 1.05                             | 1.09                              | 0.48                             |
| Calvin cycle         | CFBP1                       | 1.00                              | 0.31                             | 0.10                              | 0.04                             |
| Calvin cycle         | CP12-1                      | 1.00                              | 0.68                             | 0.60                              | 0.19                             |
| Calvin cycle         | CP12-2                      | 1.00                              | 0.40                             | 0.23                              | 0.04                             |
| Calvin cycle         | GAPA1                       | 1.00                              | 0.38                             | 0.27                              | 0.05                             |
| Calvin cycle         | GAPA2                       | 1.00                              | 1.38                             | 0.23                              | 0.21                             |
| Calvin cycle         | PRK                         | 1.00                              | 0.50                             | 0.24                              | 0.06                             |
| Calvin cycle         | RBCL                        | 1.00                              | 0.63                             | 0.27                              | 0.07                             |
| Calvin cycle         | RBCS-1A                     | 1.00                              | 0.56                             | 0.21                              | 0.06                             |
| Calvin cycle         | RBCS-1B                     | 1.00                              | 0.56                             | 0.25                              | 0.05                             |
| Calvin cycle         | RBCS-2B                     | 1.00                              | 0.48                             | 0.23                              | 0.05                             |
| Calvin cycle         | RCA                         | 1.00                              | 0.34                             | 0.12                              | 0.03                             |
| Calvin cycle         | SBPASE                      | 1.00                              | 0.28                             | 0.12                              | 0.04                             |
| Calvin cycle         | TIM                         | 1.00                              | 0.48                             | 0.26                              | 0.07                             |
| Calvin cycle         | TKL-1                       | 1.00                              | 0.52                             | 0.19                              | 0.08                             |
| Calvin cycle         | Average                     | 1.00                              | 0.54                             | 0.24                              | 0.07                             |
| Clp                  | ClpB3                       | 1.00                              | 0.53                             | 0.35                              | 0.15                             |
| Clp                  | ClpC1                       | 1.00                              | 0.70                             | 0.54                              | 0.16                             |
| Clp                  | ClpD                        | 1.00                              | 0.93                             | 1.61                              | 0.63                             |
| Clp                  | ClpF                        | 1.00                              | 0.37                             | 0.18                              | 0.05                             |
| Clp                  | ClpP1                       | 1.00                              | 0.65                             | 0.51                              | 0.15                             |
| Clp                  | ClpP3                       | 1.00                              | 0.68                             | 0.44                              | 0.12                             |
| Clp                  | ClpP4                       | 1.00                              | 0.56                             | 0.28                              | 0.07                             |
| Clp                  | ClpP5                       | 1.00                              | 0.59                             | 0.40                              | 0.07                             |
| Clp                  | ClpP6                       | 1.00                              | 0.59                             | 0.52                              | 0.12                             |
| Clp                  | ClpR1                       | 1.00                              | 0.83                             | 0.77                              | 0.24                             |
| Clp                  | ClpR2                       | 1.00                              | 0.75                             | 0.48                              | 0.14                             |
| Clp                  | ClpR3                       | 1.00                              | 0.63                             | 0.43                              | 0.16                             |
| Clp                  | ClpR4                       | 1.00                              | 0.65                             | 0.51                              | 0.18                             |
| Clp                  | ClpT1                       | 1.00                              | 0.83                             | 0.72                              | 0.17                             |
| Clp                  | ClpT2                       | 1.00                              | 0.62                             | 0.54                              | 0.12                             |
| Clp                  | Average                     | 1.00                              | 0.66                             | 0.55                              | 0.17                             |
| Deg                  | DegP1                       | 1.00                              | 0.78                             | 0.55                              | 0.21                             |
| Deg                  | DegP2                       | 1.00                              | 0.50                             | 0.37                              | 0.08                             |
| Deg                  | DegP5                       | 1.00                              | 0.71                             | 0.57                              | 0.25                             |
| Deg                  | DegP7                       | 1.00                              | 1.02                             | 0.88                              | 0.35                             |
| Deg                  | DegP8                       | 1.00                              | 0.56                             | 0.59                              | 0.19                             |
| Deg                  | DegP9                       | 1.00                              | 0.81                             | 0.62                              | 0.18                             |
| Deg                  | Average                     | 1.00                              | 0.73                             | 0.60                              | 0.21                             |
| FtsH                 | FtsH1                       | 1.00                              | 0.75                             | 0.43                              | 0.18                             |
| FtsH                 | FtsH11                      | 1.00                              | 0.68                             | 0.42                              | 0.12                             |
| FtsH                 | FtsH12                      | 1.00                              | 0.51                             | 0.46                              | 0.12                             |
| FtsH                 | FtsH2                       | 1.00                              | 0.49                             | 0.29                              | 0.13                             |
| FtsH                 | FtsH5                       | 1.00                              | 0.51                             | 0.36                              | 0.11                             |
| FtsH                 | FtsH8                       | 1.00                              | 0.62                             | 0.60                              | 0.23                             |
| FtsH                 | FtsH9                       | 1.00                              | 0.46                             | 0.17                              | 0.06                             |
| FtsH                 | FtsH11                      | 1.00                              | 0.39                             | 0.32                              | 0.08                             |
| FtsH                 | FtsH12                      | 1.00                              | 0.69                             | 0.71                              | 0.18                             |
| FtsH                 | FtsH13                      | 1.00                              | 0.29                             | 0.27                              | 0.08                             |
| FtsH                 | FtsH14                      | 1.00                              | 0.27                             | 1.14                              | 0.09                             |

|                               |            |      |      |      |      |
|-------------------------------|------------|------|------|------|------|
| FtsH                          | FtsHI5     | 1.00 | 0.54 | 0.65 | 0.18 |
| FtsH                          | Average    | 1.00 | 0.52 | 0.49 | 0.13 |
| Other chloroplastic proteases | ARASP      | 1.00 | 0.41 | 0.80 | 0.26 |
| Other chloroplastic proteases | ARASP2     | 1.00 | 0.53 | 0.45 | 0.15 |
| Other chloroplastic proteases | EGY1       | 1.00 | 0.34 | 0.15 | 0.06 |
| Other chloroplastic proteases | EGY2       | 1.00 | 0.75 | 0.74 | 0.25 |
| Other chloroplastic proteases | LON1       | 1.00 | 0.76 | 0.59 | 0.16 |
| Other chloroplastic proteases | OOP        | 1.00 | 0.87 | 0.65 | 0.24 |
| Other chloroplastic proteases | PGM48      | 1.00 | 0.69 | 0.51 | 0.15 |
| Other chloroplastic proteases | PLSP1      | 1.00 | 0.49 | 0.37 | 0.08 |
| Other chloroplastic proteases | PREP1      | 1.00 | 0.66 | 0.50 | 0.15 |
| Other chloroplastic proteases | SPP        | 1.00 | 1.06 | 0.20 | 0.08 |
| Other chloroplastic proteases | SPPA       | 1.00 | 0.71 | 0.64 | 0.31 |
| Other chloroplastic proteases | Average    | 1.00 | 0.66 | 0.51 | 0.17 |
| PAP                           | PAP1       | 1.00 | 0.62 | 0.49 | 0.22 |
| PAP                           | PAP10      | 1.00 | 0.81 | 0.91 | 0.28 |
| PAP                           | PAP13      | 1.00 | 0.72 | 0.85 | 0.26 |
| PAP                           | PAP2       | 1.00 | 1.63 | 2.81 | 1.40 |
| PAP                           | PAP3       | 1.00 | 0.81 | 0.82 | 0.37 |
| PAP                           | PAP6       | 1.00 | 0.96 | 0.82 | 0.42 |
| PAP                           | PAP9       | 1.00 | 0.62 | 0.64 | 0.23 |
| PAP                           | Average    | 1.00 | 0.88 | 1.05 | 0.45 |
| Plastoglobule other           | AKR        | 1.00 | 0.45 | 0.28 | 0.08 |
| Plastoglobule other           | At3g43540  | 1.00 | 0.97 | 0.52 | 0.05 |
| Plastoglobule other           | At4g13200  | 1.00 | 0.84 | 1.24 | 0.61 |
| Plastoglobule other           | CCD4       | 1.00 | 0.35 | 0.26 | 0.03 |
| Plastoglobule other           | Esterase 1 | 1.00 | 0.64 | 0.73 | 0.11 |
| Plastoglobule other           | FVR1       | 1.00 | 0.69 | 0.53 | 0.21 |
| Plastoglobule other           | FVR2       | 1.00 | 0.60 | 0.45 | 0.21 |
| Plastoglobule other           | HBP3       | 1.00 | 0.89 | 0.73 | 0.26 |
| Plastoglobule other           | NDC1       | 1.00 | 0.67 | 0.71 | 0.22 |
| Plastoglobule other           | PES1       | 1.00 | 0.89 | 1.80 | 1.80 |
| Plastoglobule other           | PES2       | 1.00 | 1.18 | 1.33 | 0.53 |
| Plastoglobule other           | PGM48      | 1.00 | 0.69 | 0.51 | 0.15 |
| Plastoglobule other           | PGSAG      | 1.00 | 1.03 | 0.90 | 0.30 |
| Plastoglobule other           | PLAT1      | 1.00 | 0.89 | 0.95 | 0.37 |
| Plastoglobule other           | UBIE-MT1   | 1.00 | 0.62 | 0.55 | 0.21 |
| Plastoglobule other           | UBIE-MT2   | 1.00 | 0.70 | 0.60 | 0.27 |
| Plastoglobule other           | VTE1       | 1.00 | 0.82 | 0.72 | 0.49 |
| Plastoglobule other           | Average    | 1.00 | 0.76 | 0.75 | 0.35 |
| Proteasome                    | PAA1       | 1.00 | 0.83 | 0.54 | 0.16 |
| Proteasome                    | PAA2       | 1.00 | 1.46 | 0.93 | 0.36 |
| Proteasome                    | PAB1       | 1.00 | 1.16 | 0.52 | 0.25 |
| Proteasome                    | PAB2       | 1.00 | 0.78 | 0.28 | 0.10 |
| Proteasome                    | PAC1       | 1.00 | 0.99 | 0.67 | 0.22 |
| Proteasome                    | PAD2       | 1.00 | 1.26 | 0.72 | 0.20 |
| Proteasome                    | PAE1       | 1.00 | 1.00 | 0.48 | 0.12 |
| Proteasome                    | PAF1       | 1.00 | 0.97 | 0.78 | 0.26 |
| Proteasome                    | PAG1       | 1.00 | 0.92 | 0.82 | 0.24 |
| Proteasome                    | PBA1       | 1.00 | 0.97 | 0.84 | 0.26 |
| Proteasome                    | PBB1       | 1.00 | 1.11 | 0.88 | 0.25 |
| Proteasome                    | PBB2       | 1.00 | 0.82 | 0.69 | 0.20 |
| Proteasome                    | PBC1       | 1.00 | 0.68 | 0.62 | 0.18 |
| Proteasome                    | PBC2       | 1.00 | 1.87 | 0.59 | 0.02 |
| Proteasome                    | PBD1       | 1.00 | 0.77 | 0.73 | 0.19 |
| Proteasome                    | PBD2       | 1.00 | 2.39 | 1.67 | 0.38 |
| Proteasome                    | PBE1       | 1.00 | 0.82 | 0.71 | 0.20 |
| Proteasome                    | PBE2       | 1.00 | 0.71 | 0.69 | 0.17 |

|                        |         |      |      |      |      |
|------------------------|---------|------|------|------|------|
| Proteasome             | PBG1    | 1.00 | 1.04 | 0.67 | 0.18 |
| Proteasome             | PRC6A   | 1.00 | 1.93 | 0.64 | 0.22 |
| Proteasome             | RPN10   | 1.00 | 0.90 | 0.61 | 0.10 |
| Proteasome             | RPN11   | 1.00 | 0.87 | 0.35 | 0.09 |
| Proteasome             | RPN12A  | 1.00 | 0.85 | 0.65 | 0.18 |
| Proteasome             | RPN1A   | 1.00 | 0.73 | 0.97 | 0.33 |
| Proteasome             | RPN1B   | 1.00 | 1.14 | 1.06 | 0.39 |
| Proteasome             | RPN2A   | 1.00 | 0.88 | 0.64 | 0.15 |
| Proteasome             | RPN2B   | 1.00 | 1.21 | 0.89 | 0.31 |
| Proteasome             | RPN3B   | 1.00 | 0.66 | 0.40 | 0.15 |
| Proteasome             | RPN6    | 1.00 | 1.03 | 0.98 | 0.28 |
| Proteasome             | RPN7    | 1.00 | 0.84 | 0.62 | 0.24 |
| Proteasome             | RPN8A   | 1.00 | 0.98 | 0.73 | 0.23 |
| Proteasome             | RPN9A   | 1.00 | 0.64 | 0.73 | 0.15 |
| Proteasome             | RPN9B   | 1.00 | 0.98 | 0.88 | 0.27 |
| Proteasome             | RPT1A   | 1.00 | 0.91 | 0.69 | 0.31 |
| Proteasome             | RPT2B   | 1.00 | 1.01 | 0.32 | 0.20 |
| Proteasome             | RPT3    | 1.00 | 0.99 | 0.49 | 0.18 |
| Proteasome             | RPT4B   | 1.00 | 1.57 | 1.52 | 0.46 |
| Proteasome             | RPT5A   | 1.00 | 0.92 | 0.83 | 0.22 |
| Proteasome             | RPT6A   | 1.00 | 0.74 | 0.37 | 0.09 |
| Proteasome             | Average | 1.00 | 1.03 | 0.72 | 0.22 |
| Ribosome (Chloroplast) | RPL1    | 1.00 | 0.44 | 0.23 | 0.03 |
| Ribosome (Chloroplast) | RPL10   | 1.00 | 0.33 | 0.25 | 0.04 |
| Ribosome (Chloroplast) | RPL11   | 1.00 | 0.39 | 0.28 | 0.03 |
| Ribosome (Chloroplast) | RPL12A  | 1.00 | 0.40 | 0.29 | 0.04 |
| Ribosome (Chloroplast) | RPL13   | 1.00 | 0.27 | 0.10 | 0.02 |
| Ribosome (Chloroplast) | RPL14   | 1.00 | 0.34 | 0.23 | 0.03 |
| Ribosome (Chloroplast) | RPL15   | 1.00 | 0.28 | 0.21 | 0.02 |
| Ribosome (Chloroplast) | RPL16   | 1.00 | 0.28 | 0.18 | 0.02 |
| Ribosome (Chloroplast) | RPL17   | 1.00 | 0.37 | 0.25 | 0.05 |
| Ribosome (Chloroplast) | RPL18   | 1.00 | 0.63 | 0.12 | 0.05 |
| Ribosome (Chloroplast) | RPL2    | 1.00 | 0.25 | 0.24 | 0.02 |
| Ribosome (Chloroplast) | RPL20   | 1.00 | 0.20 | 0.18 | 0.02 |
| Ribosome (Chloroplast) | RPL21   | 1.00 | 0.39 | 0.30 | 0.04 |
| Ribosome (Chloroplast) | RPL22   | 1.00 | 0.32 | 0.25 | 0.03 |
| Ribosome (Chloroplast) | RPL23   | 1.00 | 0.29 | 0.22 | 0.03 |
| Ribosome (Chloroplast) | RPL24   | 1.00 | 0.26 | 0.17 | 0.02 |
| Ribosome (Chloroplast) | RPL27   | 1.00 | 0.24 | 0.23 | 0.03 |
| Ribosome (Chloroplast) | RPL28   | 1.00 | 0.21 | 0.15 | 0.02 |
| Ribosome (Chloroplast) | RPL29   | 1.00 | 0.31 | 0.28 | 0.03 |
| Ribosome (Chloroplast) | RPL31   | 1.00 | 0.32 | 0.20 | 0.03 |
| Ribosome (Chloroplast) | RPL3A   | 1.00 | 0.36 | 0.21 | 0.04 |
| Ribosome (Chloroplast) | RPL4    | 1.00 | 0.37 | 0.24 | 0.05 |
| Ribosome (Chloroplast) | RPL5    | 1.00 | 0.29 | 0.21 | 0.02 |
| Ribosome (Chloroplast) | RPL6    | 1.00 | 0.45 | 0.20 | 0.05 |
| Ribosome (Chloroplast) | RPL9    | 1.00 | 0.28 | 0.21 | 0.02 |
| Ribosome (Chloroplast) | RPS1    | 1.00 | 0.37 | 0.21 | 0.03 |
| Ribosome (Chloroplast) | RPS10   | 1.00 | 0.30 | 0.15 | 0.03 |
| Ribosome (Chloroplast) | RPS11   | 1.00 | 0.27 | 0.19 | 0.04 |
| Ribosome (Chloroplast) | RPS12   | 1.00 | 0.23 | 0.04 | 0.02 |
| Ribosome (Chloroplast) | RPS13   | 1.00 | 0.39 | 0.31 | 0.04 |
| Ribosome (Chloroplast) | RPS14   | 1.00 | 0.20 | 0.11 | 0.02 |
| Ribosome (Chloroplast) | RPS15   | 1.00 | 0.18 | 0.14 | 0.01 |
| Ribosome (Chloroplast) | RPS16-1 | 1.00 | 0.38 | 0.14 | 0.03 |
| Ribosome (Chloroplast) | RPS17   | 1.00 | 0.33 | 0.26 | 0.04 |
| Ribosome (Chloroplast) | RPS18   | 1.00 | 0.20 | 0.22 | 0.03 |
| Ribosome (Chloroplast) | RPS19   | 1.00 | 0.32 | 0.22 | 0.04 |

|                        |          |      |       |       |      |
|------------------------|----------|------|-------|-------|------|
| Ribosome (Chloroplast) | RPS2     | 1.00 | 0.36  | 0.29  | 0.03 |
| Ribosome (Chloroplast) | RPS20    | 1.00 | 0.33  | 0.24  | 0.03 |
| Ribosome (Chloroplast) | RPS3     | 1.00 | 0.27  | 0.18  | 0.03 |
| Ribosome (Chloroplast) | RPS4     | 1.00 | 0.23  | 0.23  | 0.02 |
| Ribosome (Chloroplast) | RPS5     | 1.00 | 0.29  | 0.25  | 0.05 |
| Ribosome (Chloroplast) | RPS6     | 1.00 | 0.32  | 0.23  | 0.03 |
| Ribosome (Chloroplast) | RPS7     | 1.00 | 0.29  | 0.23  | 0.03 |
| Ribosome (Chloroplast) | RPS8     | 1.00 | 0.29  | 0.23  | 0.04 |
| Ribosome (Chloroplast) | RPS9     | 1.00 | 0.40  | 0.25  | 0.04 |
| Ribosome (Chloroplast) | Average  | 1.00 | 0.32  | 0.21  | 0.03 |
| Ribosome (Cytosol)     | RPL13D   | 1.00 | 0.62  | 0.68  | 0.13 |
| Ribosome (Cytosol)     | RPL18AB  | 1.00 | 0.37  | 0.56  | 0.09 |
| Ribosome (Cytosol)     | RPL26B   | 1.00 | 0.27  | 0.37  | 0.09 |
| Ribosome (Cytosol)     | RPL27AC  | 1.00 | 0.43  | 0.50  | 0.08 |
| Ribosome (Cytosol)     | RPL27B   | 1.00 | 15.07 | 10.36 | 2.75 |
| Ribosome (Cytosol)     | RPL27C   | 1.00 | 0.59  | 0.78  | 0.17 |
| Ribosome (Cytosol)     | RPL30A   | 1.00 | 0.98  | 0.68  | 0.28 |
| Ribosome (Cytosol)     | RPL30B   | 1.00 | 0.36  | 0.59  | 0.16 |
| Ribosome (Cytosol)     | RPL32A   | 1.00 | 0.58  | 0.67  | 0.15 |
| Ribosome (Cytosol)     | RPL34B   | 1.00 | 0.32  | 0.19  | 0.06 |
| Ribosome (Cytosol)     | RPL35AD  | 1.00 | 0.48  | 0.47  | 0.08 |
| Ribosome (Cytosol)     | RPL35B   | 1.00 | 0.68  | 0.66  | 0.11 |
| Ribosome (Cytosol)     | RPL36C   | 1.00 | 0.26  | 0.42  | 0.05 |
| Ribosome (Cytosol)     | RPL37AC  | 1.00 | 0.25  | 0.34  | 0.04 |
| Ribosome (Cytosol)     | RPL37B   | 1.00 | 0.37  | 0.33  | 0.08 |
| Ribosome (Cytosol)     | RPL38    | 1.00 | 1.12  | 0.62  | 0.15 |
| Ribosome (Cytosol)     | RPL7A    | 1.00 | 0.45  | 0.24  | 0.02 |
| Ribosome (Cytosol)     | RPP1A    | 1.00 | 1.60  | 1.38  | 0.24 |
| Ribosome (Cytosol)     | RPP1C    | 1.00 | 0.67  | 0.69  | 0.15 |
| Ribosome (Cytosol)     | RPP2A    | 1.00 | 0.84  | 0.26  | 0.04 |
| Ribosome (Cytosol)     | RPP2C    | 1.00 | 0.83  | 1.03  | 0.50 |
| Ribosome (Cytosol)     | RPP3B    | 1.00 | 0.44  | 0.51  | 0.12 |
| Ribosome (Cytosol)     | RPS10A   | 1.00 | 0.46  | 0.54  | 0.06 |
| Ribosome (Cytosol)     | RPS11C   | 1.00 | 0.65  | 0.66  | 0.14 |
| Ribosome (Cytosol)     | RPS15A   | 1.00 | 0.70  | 0.43  | 0.09 |
| Ribosome (Cytosol)     | RPS17B   | 1.00 | 0.29  | 0.07  | 0.01 |
| Ribosome (Cytosol)     | RPS25D   | 1.00 | 0.30  | 0.13  | 0.04 |
| Ribosome (Cytosol)     | RPS25E   | 1.00 | 0.39  | 0.23  | 0.04 |
| Ribosome (Cytosol)     | RPS27AB  | 1.00 | 0.95  | 0.97  | 0.34 |
| Ribosome (Cytosol)     | RPS29    | 1.00 | 0.61  | 0.38  | 0.08 |
| Ribosome (Cytosol)     | RPS30    | 1.00 | 0.44  | 0.35  | 0.03 |
| Ribosome (Cytosol)     | Average* | 1.00 | 0.58  | 0.52  | 0.12 |
| Ubiquitin E3           | BPM4     | 1.00 | 0.79  | 0.81  | 0.13 |
| Ubiquitin E3           | CAND1    | 1.00 | 0.92  | 0.84  | 0.25 |
| Ubiquitin E3           | CSN3     | 1.00 | 1.04  | 0.65  | 0.22 |
| Ubiquitin E3           | CSN6A    | 1.00 | 1.34  | 0.60  | 0.22 |
| Ubiquitin E3           | CUL3A    | 1.00 | 1.14  | 0.99  | 0.31 |
| Ubiquitin E3           | CUL4     | 1.00 | 0.86  | 0.61  | 0.28 |
| Ubiquitin E3           | DCAF1    | 1.00 | 0.94  | 0.89  | 0.14 |
| Ubiquitin E3           | DDB1A    | 1.00 | 3.76  | 0.25  | 1.05 |
| Ubiquitin E3           | HRD3A    | 1.00 | 0.82  | 0.36  | 0.14 |
| Ubiquitin E3           | KEG      | 1.00 | 1.21  | 1.39  | 0.47 |
| Ubiquitin E3           | PRT6     | 1.00 | 1.82  | 1.70  | 0.56 |
| Ubiquitin E3           | PUB13    | 1.00 | 1.15  | 0.82  | 0.29 |
| Ubiquitin E3           | RGLG1    | 1.00 | 1.09  | 1.60  | 0.34 |
| Ubiquitin E3           | RGLG4    | 1.00 | 1.53  | 0.40  | 0.29 |
| Ubiquitin E3           | RPT2     | 1.00 | 0.65  | 0.53  | 0.09 |
| Ubiquitin E3           | SAUL1    | 1.00 | 0.78  | 0.57  | 0.12 |

|                           |           |      |      |      |      |
|---------------------------|-----------|------|------|------|------|
| Ubiquitin E3              | SKP1B     | 1.00 | 1.14 | 0.79 | 0.21 |
| Ubiquitin E3              | UBA1      | 1.00 | 0.85 | 5.94 | 0.32 |
| Ubiquitin E3              | UBA2      | 1.00 | 0.52 | 0.34 | 0.10 |
| Ubiquitin E3              | UBC27     | 1.00 | 1.36 | 0.72 | 0.36 |
| Ubiquitin E3              | UBC32     | 1.00 | 4.72 | 6.43 | 4.06 |
| Ubiquitin E3              | UIP1      | 1.00 | 0.99 | 0.66 | 0.21 |
| Ubiquitin E3              | UPL1      | 1.00 | 1.03 | 0.70 | 0.25 |
| Ubiquitin E3              | UPL2      | 1.00 | 1.29 | 1.08 | 0.31 |
| Ubiquitin E3              | UPL3      | 1.00 | 0.67 | 0.38 | 0.10 |
| Ubiquitin E3              | UPL4      | 1.00 | 3.18 | 2.10 | 0.66 |
| Ubiquitin E3              | UPL6      | 1.00 | 0.83 | 0.42 | 0.17 |
| Ubiquitin E3              | Average   | 1.00 | 1.22 | 1.06 | 0.39 |
| Vacuolar ATPase           | AT3G28710 | 1.00 | 0.78 | 0.30 | 0.45 |
| Vacuolar ATPase           | AT3G28715 | 1.00 | 1.21 | 1.22 | 0.47 |
| Vacuolar ATPase           | AT3G42050 | 1.00 | 1.16 | 1.36 | 0.36 |
| Vacuolar ATPase           | AT3G58730 | 1.00 | 0.89 | 0.55 | 0.28 |
| Vacuolar ATPase           | VAB2      | 1.00 | 0.95 | 0.93 | 0.36 |
| Vacuolar ATPase           | VHA-A     | 1.00 | 1.08 | 1.01 | 0.35 |
| Vacuolar ATPase           | VHA-A1    | 1.00 | 1.01 | 0.95 | 0.33 |
| Vacuolar ATPase           | VHA-a2    | 1.00 | 0.51 | 0.75 | 0.25 |
| Vacuolar ATPase           | VHA-A3    | 1.00 | 1.05 | 1.32 | 0.46 |
| Vacuolar ATPase           | VHA-B1    | 1.00 | 0.93 | 0.77 | 0.17 |
| Vacuolar ATPase           | VHA-C     | 1.00 | 1.09 | 1.00 | 0.35 |
| Vacuolar ATPase           | VHA-C1    | 1.00 | 0.99 | 0.75 | 0.38 |
| Vacuolar ATPase           | VHA-E1    | 1.00 | 0.91 | 0.74 | 0.27 |
| Vacuolar ATPase           | VHA-E3    | 1.00 | 0.78 | 0.80 | 0.15 |
| Vacuolar ATPase           | VHA-F     | 1.00 | 0.66 | 0.36 | 0.19 |
| Vacuolar ATPase           | VHA-G1    | 1.00 | 0.82 | 0.72 | 0.24 |
| Vacuolar ATPase           | VHA-G2    | 1.00 | 1.38 | 1.32 | 0.27 |
| Vacuolar ATPase           | Average   | 1.00 | 0.95 | 0.87 | 0.31 |
| Vacuole proteases         | GAMMA-VPE | 1.00 | 1.81 | 1.48 | 0.61 |
| Vacuole proteases         | RD21      | 1.00 | 1.60 | 1.38 | 1.11 |
| Vacuole proteases         | Average   | 1.00 | 1.71 | 1.43 | 0.86 |
| Vacuole sorting receptors | VSR1      | 1.00 | 1.03 | 0.91 | 0.33 |
| Vacuole sorting receptors | VSR3      | 1.00 | 0.84 | 0.73 | 0.29 |
| Vacuole sorting receptors | VSR4      | 1.00 | 1.29 | 1.36 | 0.41 |
| Vacuole sorting receptors | VSR6      | 1.00 | 2.22 | 0.87 | 0.37 |
| Vacuole sorting receptors | VSR7      | 1.00 | 1.49 | 0.96 | 0.73 |
| Vacuole sorting receptors | Average   | 1.00 | 1.37 | 0.97 | 0.43 |

**Table S1. Changes in the level of different proteins during senescence.**
